# Supplementary material
Source: PubMed Central journal article supplement (PMC64978)

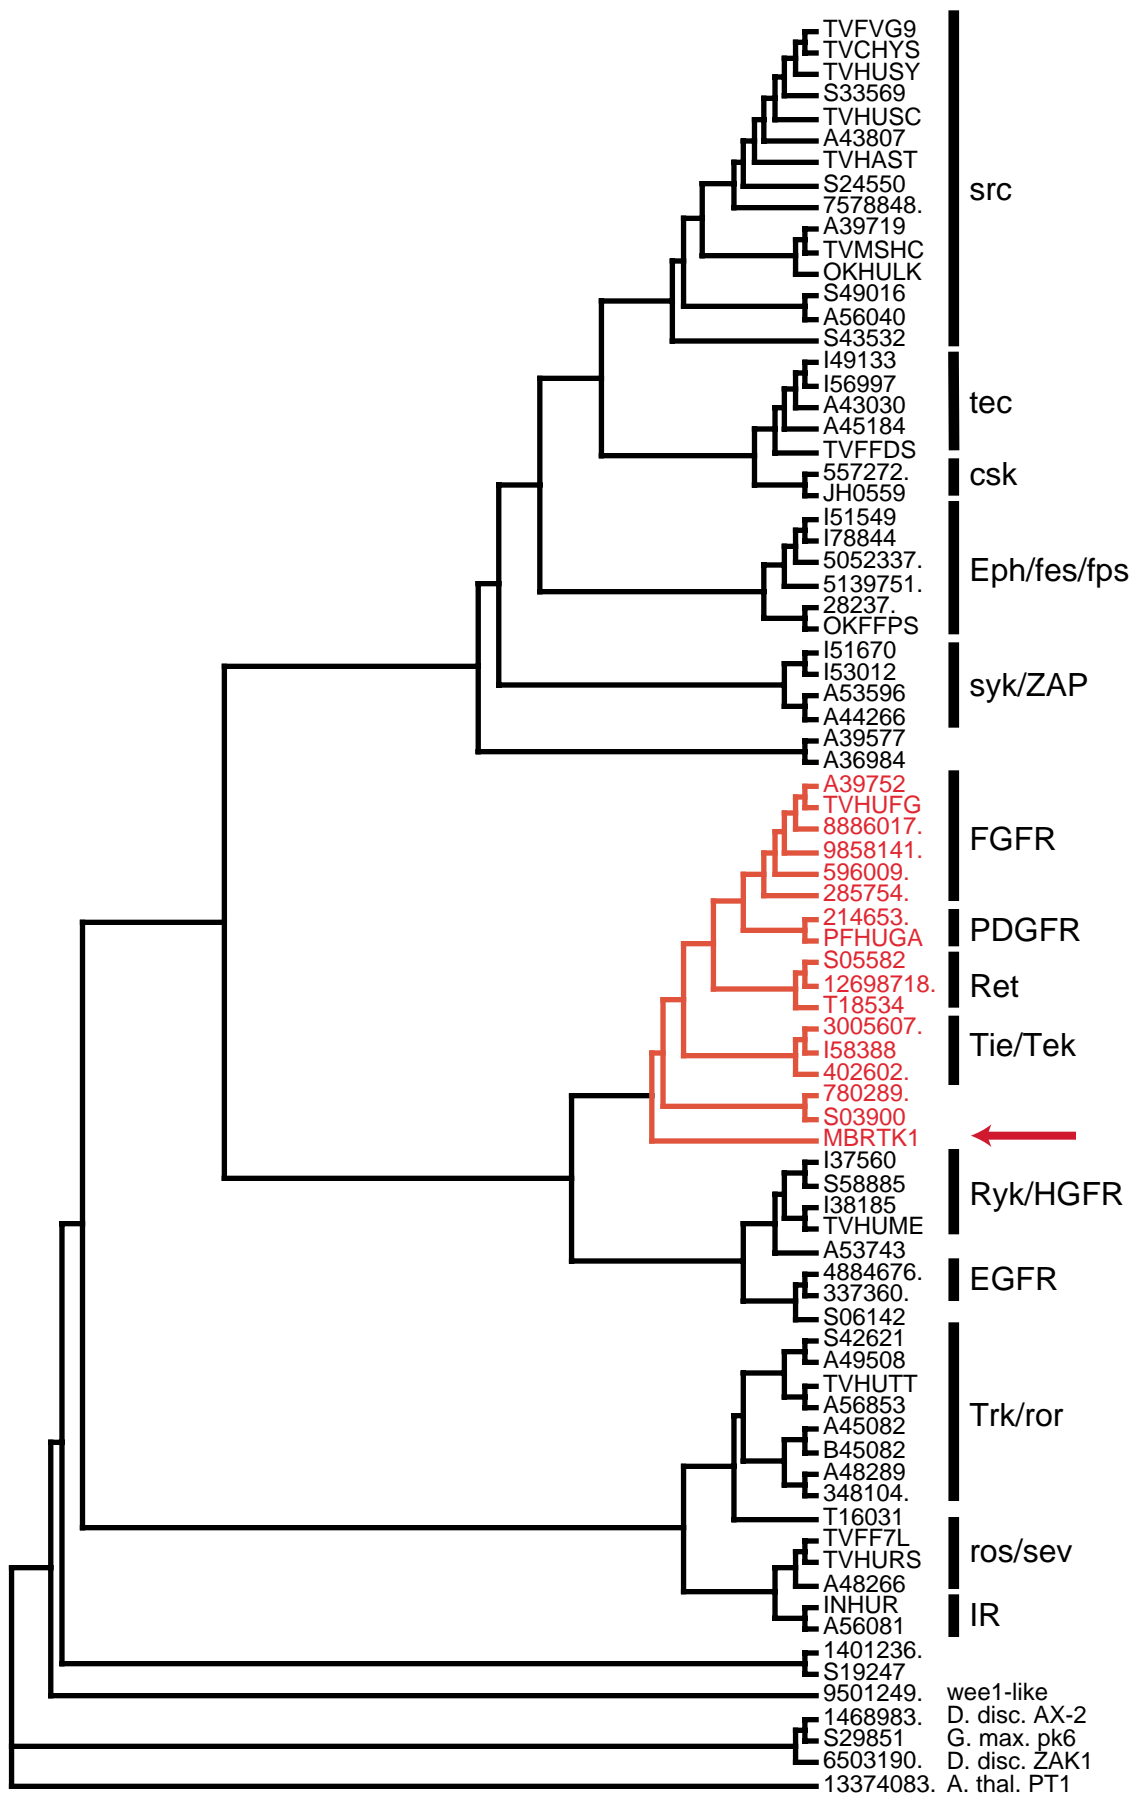

Supplement: pnas_98_26_15032__3.pdf [file pnas_98_26_15032__3.pdf]
